# Supplementary material for: Biopolymeric Films of Amphiphilic Derivatives of Chitosan: A Physicochemical Characterization and Antifungal Study
Source: Int J Mol Sci. 2019 Aug 26;20(17):4173. doi: 10.3390/ijms20174173 (PMC6747211; doi:10.3390/ijms20174173)
Supplement: Supplementary file 1 [file ijms-20-04173-s001.pdf]

## **Supplementary Materials**

### **Biopolymeric Films of Amphiphilic Derivatives of Chitosan: Physicochemical characterization and antifungal study**

**Anna Carolina Rodrigues Santos Alves<sup>1</sup>, Aline Margarete Furuyama Lima<sup>1</sup>, Marcio José Tiera<sup>1</sup>  
and Vera Aparecida de Oliveira Tiera<sup>1\*</sup>**

<sup>1</sup>Departamento de Química e Ciências Ambientais, Universidade Estadual Paulista (Unesp),  
Instituto de Biociências Letras e Ciências Exatas (Ibilce), Câmpus São José do Rio Preto, R.  
Cristóvão Colombo, 2265, 15054-000, SP, Brazil

\*Correspondence: vera.oliveira-tiera@unesp.br; Tel.: 55 17 32212358

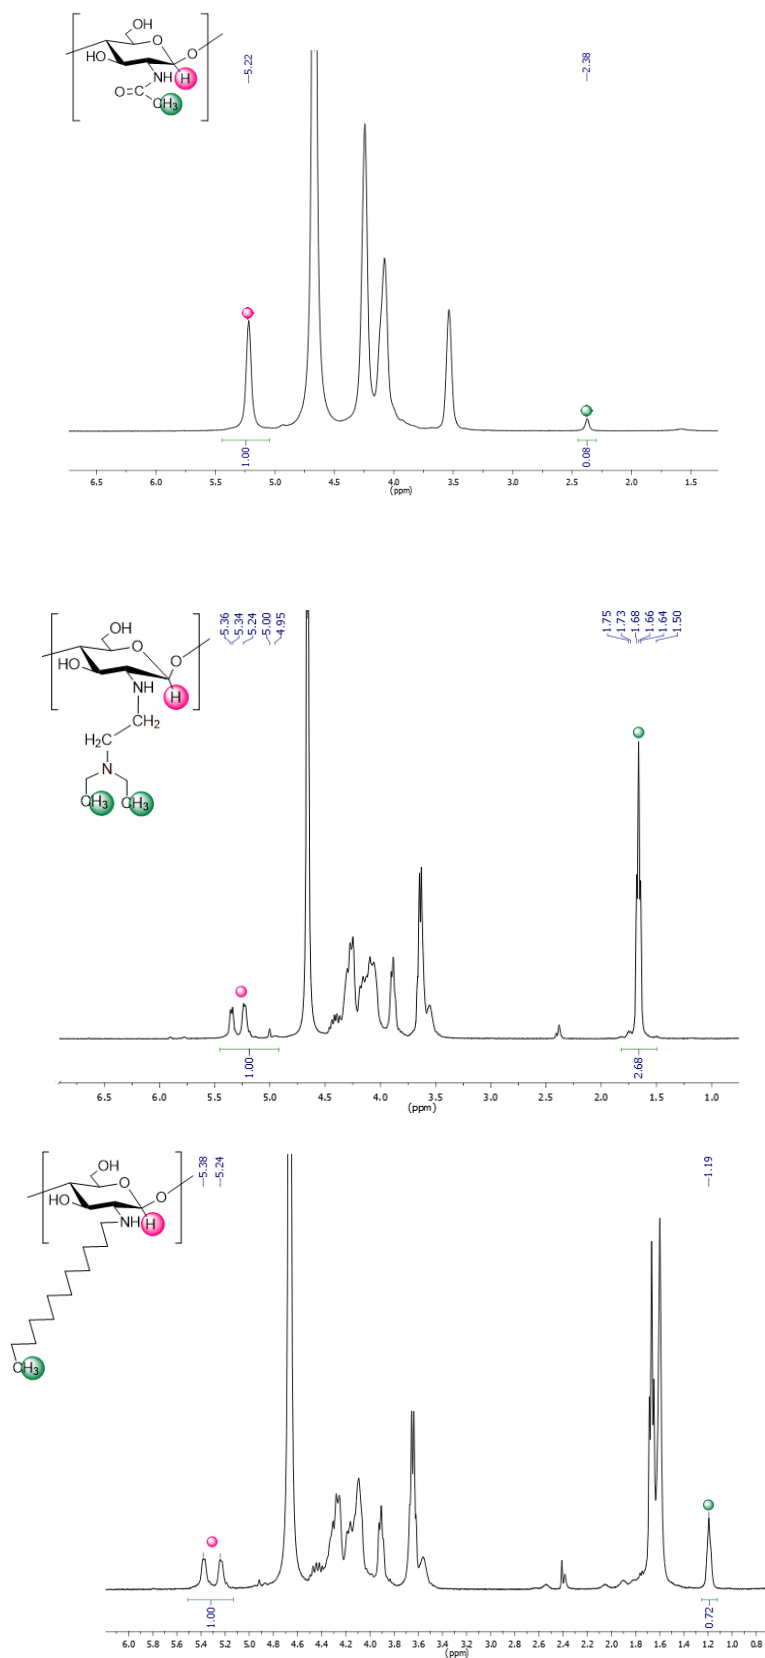

**Figure S1.**  $^1\text{H}$ -NMR of chitosan and its amphiphilic derivatives: a) deacetylated chitosan (CH<sub>H</sub>). b) diethylaminoethyl chitosan of low molecular weight ( DEAE-CH<sub>L</sub> ) and the its hydrophobized derivative.

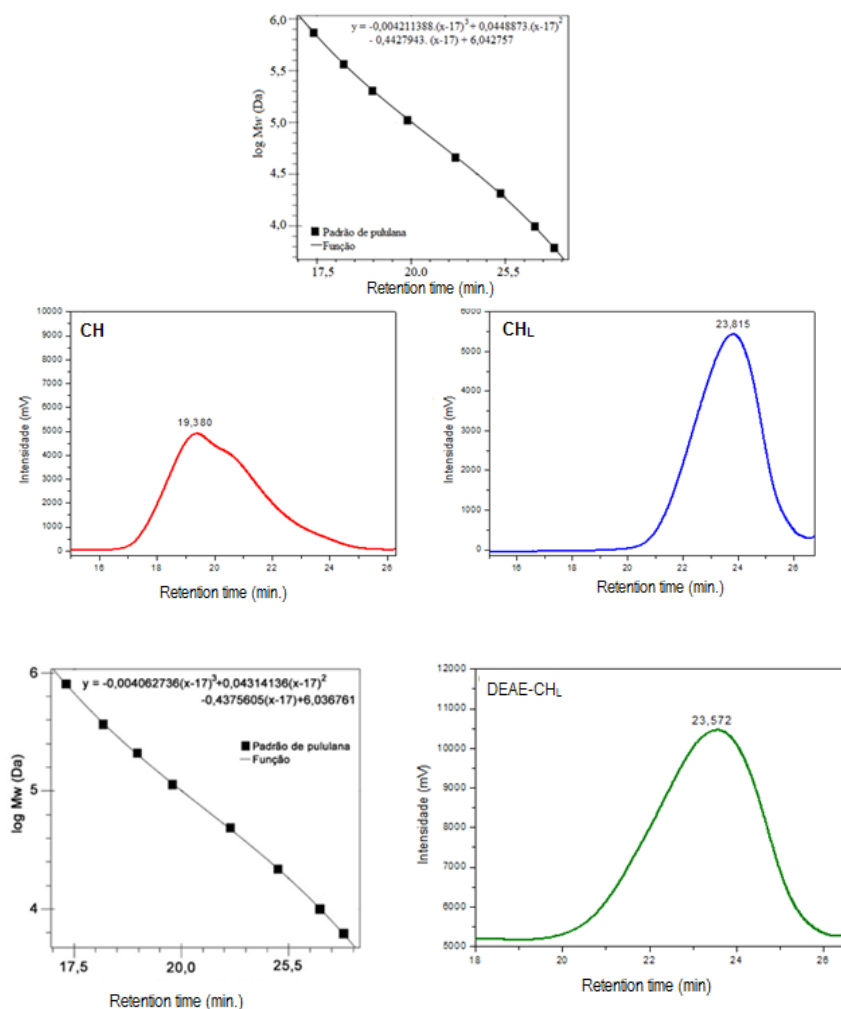

**Figure S2. a)** Calibration curve and chromatograms of deacetylated chitosans CH<sub>H</sub> (143 kDa), CH<sub>L</sub> (11 kDa) and DEAE-CH<sub>L</sub> (14 kDa) for molecular weight determination.

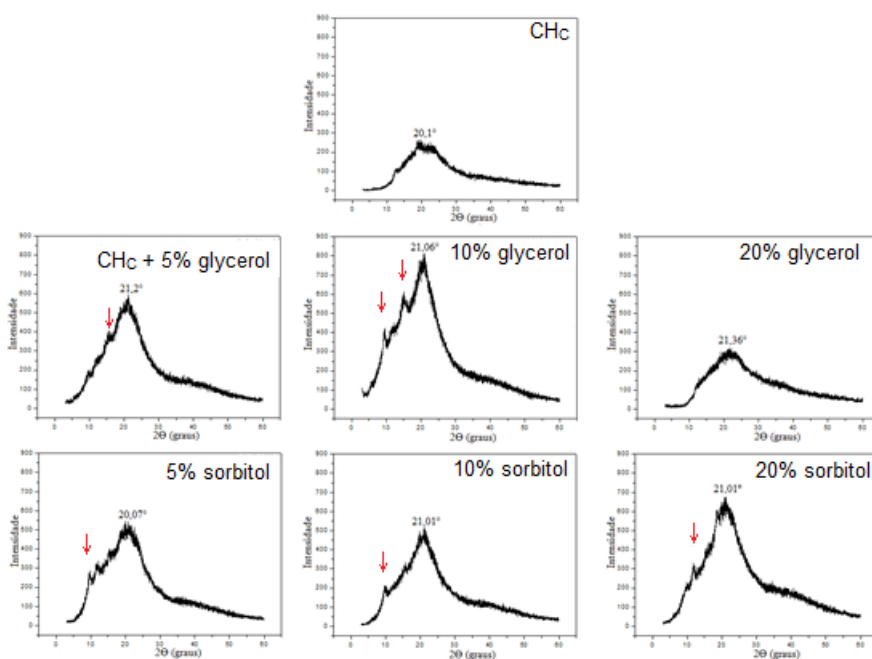

**Figure S3.** X-ray diffraction for films of commercial chitosan (CH<sub>c</sub>) and its composite films containing 5%, 10% and 20% of glycerol and sorbitol. Red arrows indicate the appearance of new peaks at ~ 2θ 10-11°, not seen for CH<sub>c</sub> without plasticizers.

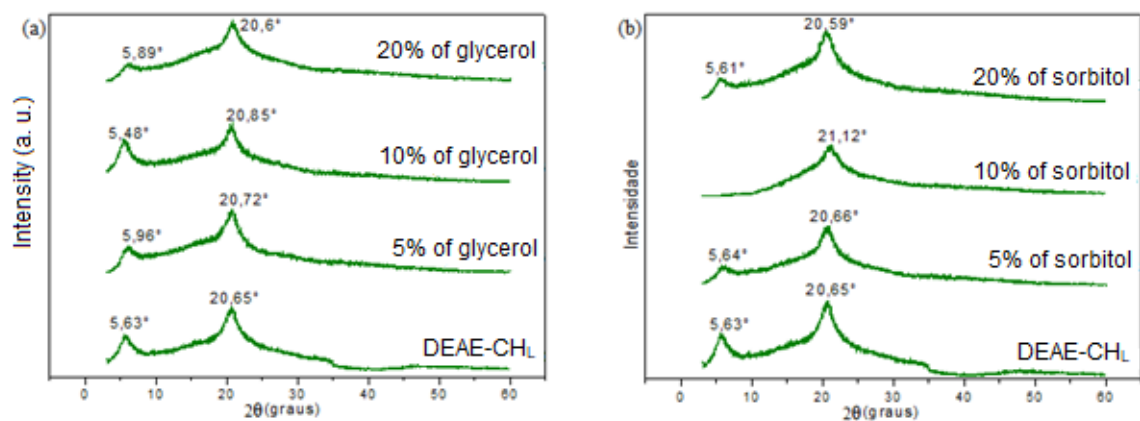

**Figure S4.** X-ray diffraction of diethylaminoethyl chitosan film (DEAE-CHI) and its composite films containing 5%, 10% and 20% of glycerol and sorbitol.

**Table S1–** Solubility of films prepared with CH<sub>C</sub> and CH<sub>H</sub> at increasing concentration of glycerol and sorbitol

| Solubility of chitosan films (%) |              |             |              |             |              |              |              |
|----------------------------------|--------------|-------------|--------------|-------------|--------------|--------------|--------------|
| Films                            | Glycerol (%) |             |              |             | Sorbitol (%) |              |              |
|                                  | 0            | 5%          | 10%          | 20%         | 5%           | 10%          | 20%          |
| CH <sub>C</sub>                  | 6.10 ± 0.50  | 8.18 ± 0.72 | 8.90 ± 1.01  | 8.51 ± 1.17 | 9.48 ± 0.38  | 11.00 ± 0.65 | 15.53 ± 0.97 |
| CH <sub>H</sub>                  | 9.22 ± 1.27  | 8.08 ± 0.07 | 10.84 ± 1.71 | 6.69 ± 0.28 | 24.24 ± 2.72 | 17.39 ± 2.14 | 21.81 ± 1.35 |
